# Supplementary material for: Radiographic and Clinical Outcomes of Dynesys Dynamic Stabilization Versus Instrumented Fusion for Degenerative Lumbar Spine Diseases With a Minimum Follow-Up Period of 2 Years: A Meta-Analysis
Source: Research Square preprint supplement (doi:10.21203/rs.3.rs-129835/v1), 2020-12-18
Supplement: Supplementary file 1 [file 137a4e23d3a9e5c7047798ba.docx]

**Supplementary Table 3. Risk of bias assessment of the cohort studies**

| Cohort | Selection | Comparability | Outcome | Total |
| --- | --- | --- | --- | --- |
| Hu et al., 2019 | ★★★ | ★★ | ★★★ | ★★★★★★★★ |
| Kuo et al., 2016 | ★★★ | ★★ | ★ | ★★★★★★ |
| Zhang et al., 2017 | ★★★ | ★ | ★★ | ★★★★★★ |
| Wu et al., 2017 | ★★★★ | ★ | ★★★ | ★★★★★★★★ |
| Liu et al., 2017 | ★★★★ | ★★ | ★ | ★★★★★★★ |
| Bredin et al., 2017 | ★★★ | ★★ | ★★ | ★★★★★★★ |
| Zhang et al., 2016 | ★★★ | ★★ | ★★★ | ★★★★★★★★ |
| He et al., 2016 | ★★★★ | ★ | ★ | ★★★★★★ |
| Wang et al., 2016 | ★★★ | ★ | ★★ | ★★★★★★ |
| Fei et al., 2015 | ★★★★ | ★★ | ★★ | ★★★★★★★★ |
| Yang et al., 2014 | ★★★★ | ★★ | ★★ | ★★★★★★★★ |
| Silvestre et al., 2014 | ★★★ | ★★ | ★★★ | ★★★★★★★★ |
| Haddad et al., 2013 | ★★★ | ★★ | ★★ | ★★★★★★★ |
