# Supplementary material for: Radiographic and Clinical Outcomes of Dynesys Dynamic Stabilization Versus Instrumented Fusion for Degenerative Lumbar Spine Diseases With a Minimum Follow-Up Period of 2 Years: A Meta-Analysis
Source: Research Square preprint supplement (doi:10.21203/rs.3.rs-129835/v1), 2020-12-18
Supplement: Supplementary file 2 [file 4b0bdf9d295158edd6fb7657.docx]

**Supplementary Table 2. Risk of bias assessment of the RCT study**

| RCT | Random sequence generation | Allocation  concealment | Blinding of participants and personnel | Blinding of outcome assessment | Incomplete outcome data | Selective reporting | Other bias |
| --- | --- | --- | --- | --- | --- | --- | --- |
| Yu et al., 2012 | Low risk | Low risk | High risk | Unclear risk | Low risk | Unclear risk | Low risk |

Other bias: the baseline characteristics in the experimental and control groups were different.
